# Supplementary material for: Quaternary climate change drives allo-peripatric speciation and refugial divergence in the Dysosma versipellis-pleiantha complex from different forest types in China
Source: PubMed Central journal article supplement (PMC5225488; doi:10.1038/srep40261), 2017-01-11
Supplement: srep40261-s1.pdf [file srep40261-s1.pdf]

## Supplementary Information

### **Quaternary climate change drives allo-peripatric speciation and refugial divergence in the *Dysosma versipellis-pleiantha* complex from different forest types in China**

Yi-Han Wang<sup>1</sup>, Hans Peter Comes<sup>2</sup>, Ya-Nan Cao<sup>1</sup>, Rui Guo<sup>1</sup>, Yun-Rui Mao<sup>1</sup> & Ying-Xiong Qiu<sup>1\*</sup>

<sup>1</sup>Key Laboratory of Conservation Biology for Endangered Wildlife of the Ministry of Education, and Laboratory of Systematic & Evolutionary Botany and Biodiversity, College of Life Sciences, Zhejiang University, Hangzhou 310058, China, <sup>2</sup>Department of Ecology and Evolution, Salzburg University, A-5020 Salzburg, Austria

\*Corresponding author. Ying-Xiong Qiu. E-mail: qyxhero@zju.edu.cn

---

## Supplementary Methods

### *Reconstruction of phylogenetic cpDNA haplotype trees*

The best-fit substitution model employed was GTR+G as determined by Akaike Information Criteria (AIC) implemented in JMODELTEST (v1.1; Posada, 2008). The ML analysis was conducted using RAXML (v7.2.8; Stamatakis *et al.*, 2008) at the CIPRES SCIENCE GATEWAY (v3.1; Miller *et al.*, 2010). Nodal support was assessed using 1000 ‘fast bootstrap’ replicates. The BI analyses were performed using MRBAYES (v3.1.2; Ronquist & Huelsenbeck, 2003). Two independent Markov chain Monte Carlo (MCMC) runs were carried out with four differentially heated chains for 50 million generations, starting from a random tree. Model parameters were estimated during the analysis. Chains were sampled every 5000 generations. Convergence of the analyses was validated by (1) the standard deviation of the partition frequency [SD(s)] across runs ( $< 0.01$ ); and (ii) monitoring the likelihood values over time using TRACER (v1.6.1; Drummond & Rambaut, 2007). The first 25% of generations were discarded as burn-in. A 50% majority-rule consensus tree was constructed from the remaining trees to estimate posterior probabilities (PPs).

### *MDA analysis*

For each model analysis, goodness-of-fit based on the sum of squared deviations (*SSD*) and Harpending’s (1994) raggedness index ( $H_{Rag}$ ) was tested using parametric bootstrapping (Schneider & Excoffier, 1999) with 1000 pseudoreplicates. Their *P* values represented the probability of obtaining a simulated *SSD* value (or  $H_{Rag}$ ) greater than or equal to the observed one. For two expanding lineages identified, the

---

MDA-derived expansion parameter ( $\tau$ ), and its 95% confidence interval (CI), were converted to absolute estimates of time since expansion using  $\tau = 2ut$  (Rogers & Harpending, 1992; Rogers, 1995), where  $u$  is the neutral mutation rate for the entire sequence per generation (Won & Hey, 2005). The value for  $u$  was calculated as  $u = \mu kg$ , where  $\mu$  is the substitution rate in substitutions per site per year (here,  $1.3 \times 10^{-9}$  s/s/y),  $k$  is the average sequence length of the cpDNA region in this study (here, 2669 bp; see the Results section), and  $g$  is the generation time in years [i.e. age of first reproduction; approximately three years, observed for *D. versipellis* in cultivation at the Botanic Garden of Zhejiang University (Qiu *et al.*, 2005)].

#### *Detection of null alleles, HWE and LD*

For the EST-SSR dataset, all 15 genotyped loci were checked for frequencies of null alleles in FREENA (Chapuis & Estoup, 2007) following the Expectation Maximization (EM) method described by Dempster *et al.* (1977). Deviations from Hardy-Weinberg equilibrium (HWE) were tested using GENEPOP (v4.0.7; Rousset, 2008). Linkage disequilibrium (LD) among loci was tested using FSTAT (v2.9.3; Goudet, 2001). Statistical significance ( $\alpha = 0.05$ ) for inferring LD or departures from HWE was evaluated based on 1000 permutations, and corrected for multiple tests using the sequential Bonferroni method (Rice, 1989).

#### *STRUCTURE analysis*

This program was run 10 times for a number of clusters ( $K$ ), ranging from 2 to 40, using a burn-in length of 100,000 and run length of 500,000 iterations. We plotted the

---

probability of the data  $[\ln P(D)]$  and the ad hoc statistic  $\Delta K$  (Evanno *et al.*, 2005) to determine the most likely  $K$ .

#### *MIGRATE-N analysis*

These analyses were run for three replicates assuming a stepwise mutation model (Estoup *et al.*, 2002) with constant mutation rates for all loci. The initial run used an estimate of  $F_{ST}$  as a starting parameter to calculate  $M$  and each subsequent run used the ML estimates from the previous run as new starting parameters. For each run, we used uniform priors and Metropolis-coupled MCMC with 10 short chains and five long chains with 10,000 and 100,000 sampled genealogies, respectively, and set a static heating scheme at four temperatures (1, 1.3, 3 and 10). Genealogies were recorded every 50 steps and the first 10,000 were discarded as burn-in.

#### *ABC analysis*

For each of the eight models, we generated a reference table with  $1 \times 10^6$  simulated data sets based on a divergence history that describes the model. All parameters that define each model (i.e. effective population size, divergence times and mutation rate) were considered as random variables with uniform distributions. For each simulation, the parameter values are drawn from their prior distributions, defining a divergence history that is used to construct a specific input file for the DIYABC program. The summary statistics of genetic variation were as follows: the mean number of alleles, mean expected heterozygosity ( $H_E$ ) and mean allele size variance for each group, the overall  $F_{ST}$ , the classification indices (analogous to genotype assignment likelihoods),

---

and the shared allelic distance between pairs of groups. For both analyses, the prior distribution of mutation rates ( $\mu$ , per generation per locus) for the EST-SSRs was assumed to be broad [ $1 \times 10^{-6}$ ,  $1 \times 10^{-3}$ ] because they likely evolve more slowly than anonymous SSRs (Ellis & Burke, 2007). Likewise, a broad gamma distribution [ $1 \times 10^{-1}$ ,  $9 \times 10^{-1}$ ] was specified for the parameter of the geometric distribution ( $P$ ) to generate multiple stepwise mutations. However, for the effective population size and divergence time parameters, we employed different priors in the two steps (see details in Table 4). The average generation time was assumed to be three years (see MDA above). To compare the posterior probability of the four scenarios in each step, the 40,000 (1% proportion) simulated datasets closest to the observed dataset were selected for a polychotomous logistic regression approach (Cornuet *et al.*, 2008, 2010) and 4,000 for the direct estimate approach. For the best supported scenario, we estimated the posterior distributions of all parameters using a local linear regression on the 100,000 simulated datasets closest to the observed dataset, after the application of a logit transformation to parameter values (Beaumont *et al.*, 2002; Cornuet *et al.*, 2008). Finally, to evaluate whether the most fitting model successfully reproduced the observed data, we performed model-checking computations by simulating 100,000 pseudo-observed data sets from the posterior distribution of all parameters. Following Cornuet *et al.* (2010), we also conducted a principal component analysis (PCA) to test statistical vectors and visualize the consistency between simulated and observed data sets, using summary statistics that had not been used for model selection in the previous ABC treatments.

## Supplementary Figures

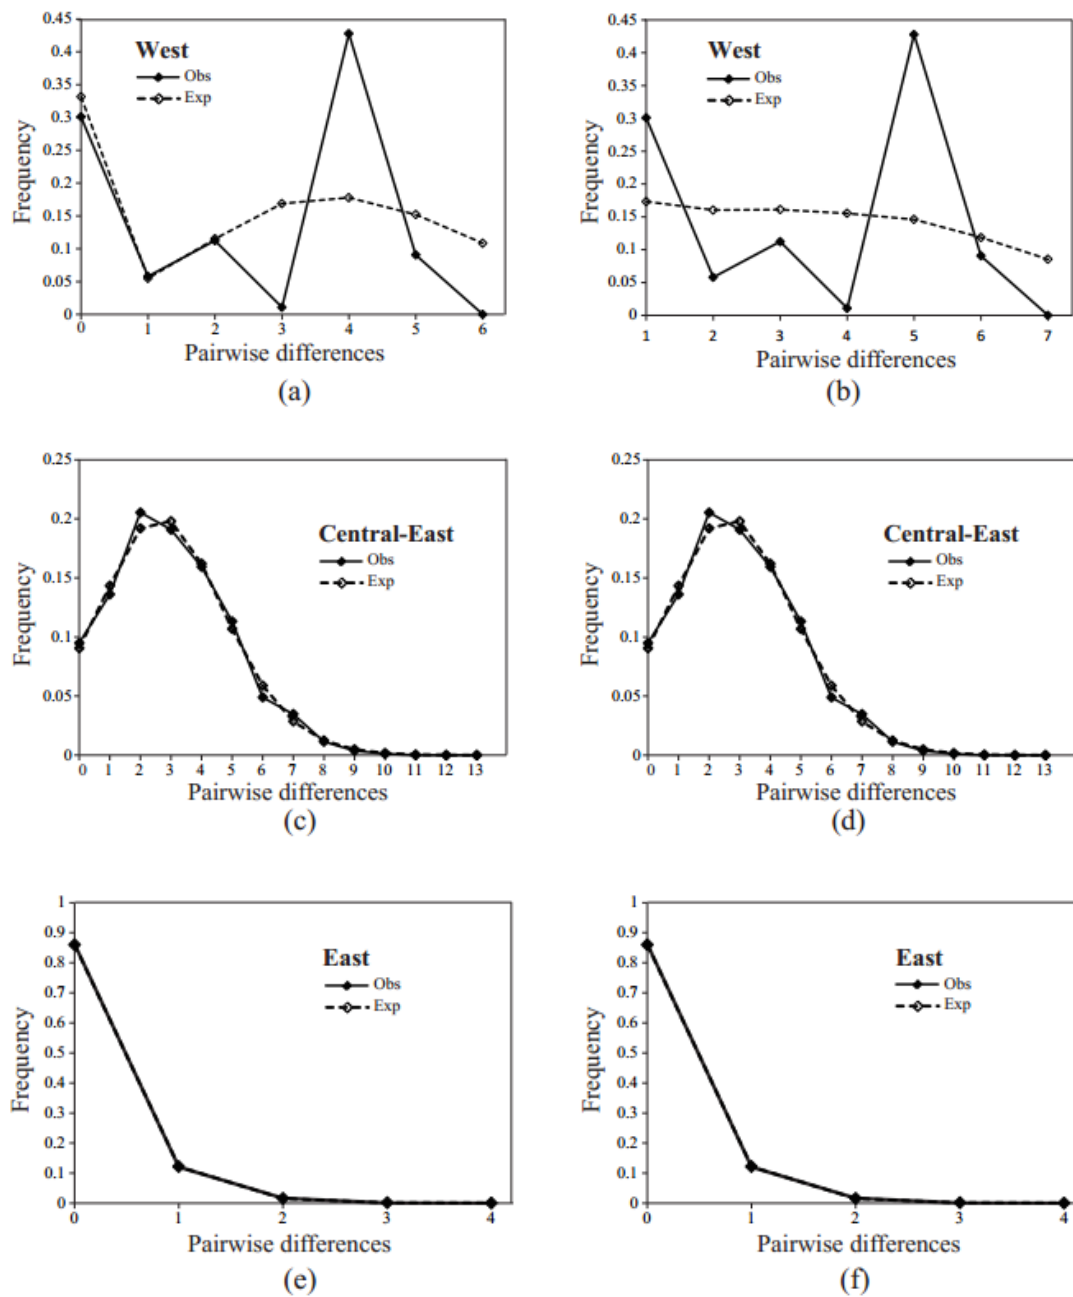

**Figure S1.** Mismatch distribution analyses (MDAs) of the three cpDNA lineages of the *Dysosma versipellis-pleiantha* complex (west, central-east: *D. versipellis s. lat.*; east: *D. pleiantha*) for the pure demographic expansion model (a, c, and e) and the spatial expansion model (b, d, and f).

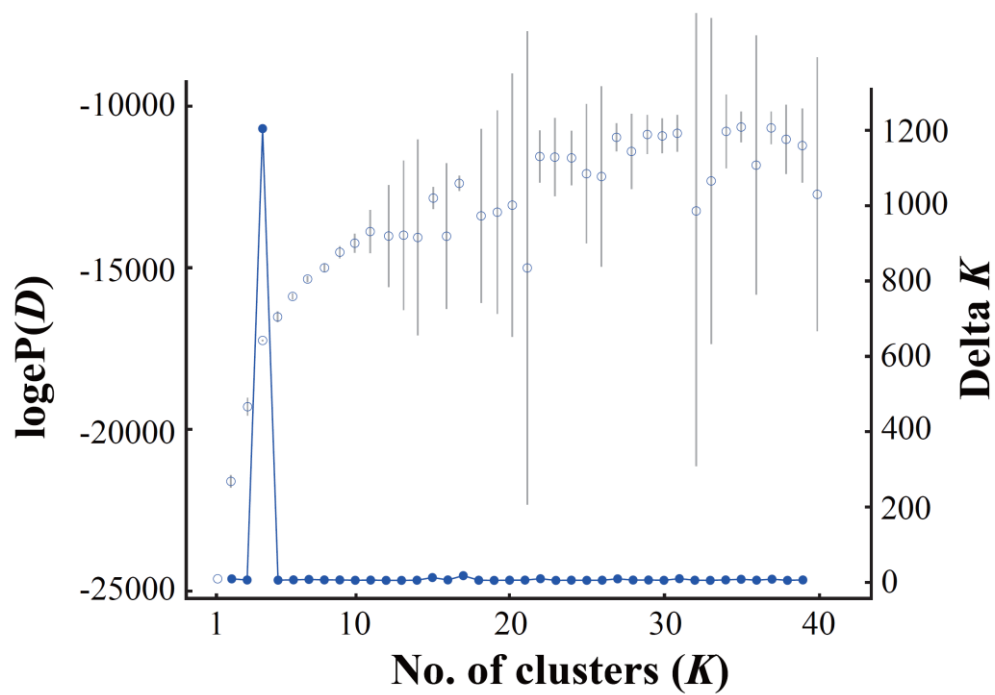

**Figure S2.** Changes of the mean posterior probability [ $\ln P(D)$ ] ( $\pm$ SD) values of each  $K$  calculated according to Pritchard *et al.* (2000) (dot plot); and the corresponding  $\Delta K$  statistics calculated according to Evanno *et al.* (2005) (line diagram) in the STRUCTURE analysis based on 15 EST-SSR loci.

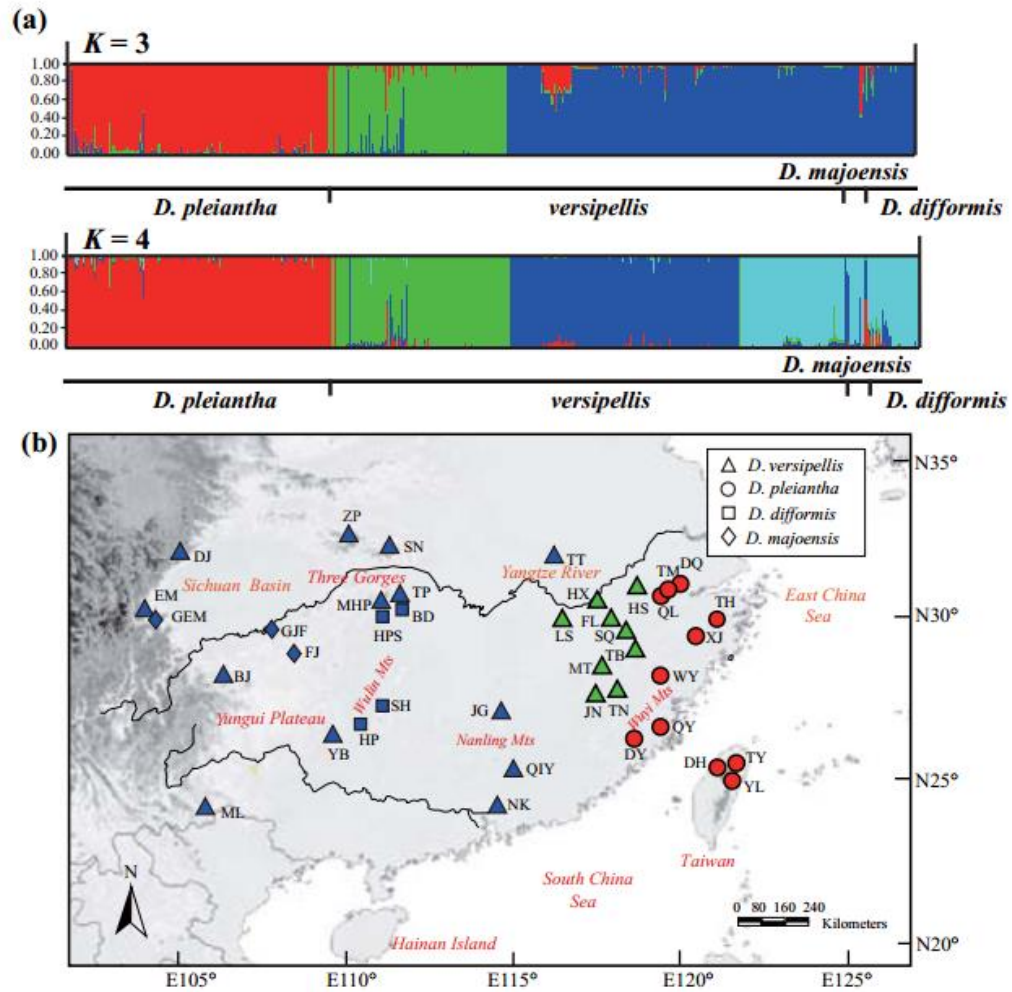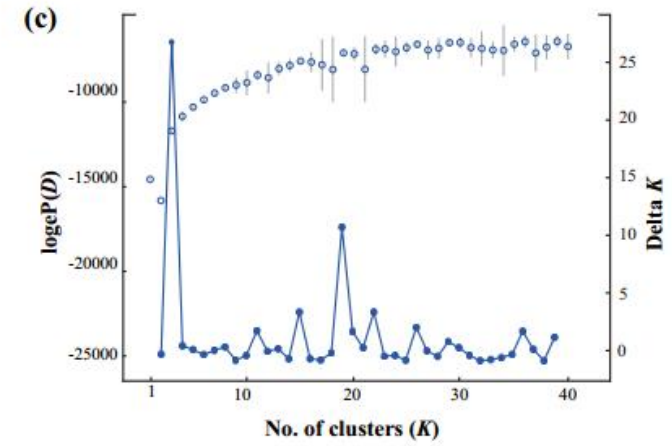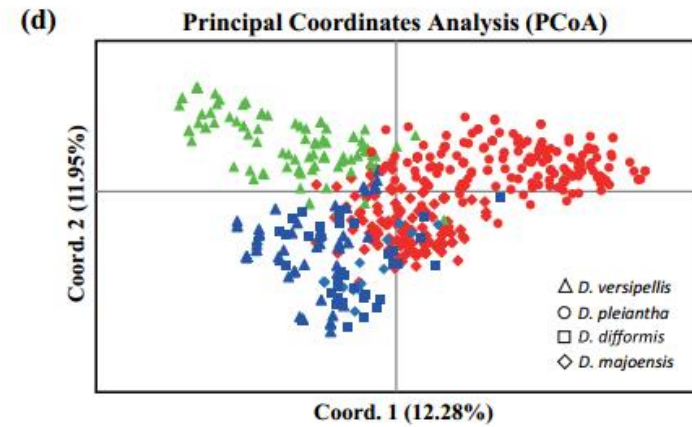



---

**Figure S3.** (a) Results of the STRUCTURE assignment test at  $K = 3$  and  $K = 4$  for 40 populations of the *Dysosma versipellis-pleiantha* complex based on genetic variation at nine neutral EST-SSR loci. (b) Geographic origin of each *Dysosma* population and their color-coded grouping according to the STRUCTURE analysis at  $K = 3$  created in ILLUSTRATOR v15.0 (<http://www.adobe.com/products/illustrator.html>). The symbol next to each sampling locality identifies the respective *Dysosma* species, while the filled color represents the cluster assigned to that population (population codes are identified in Table S2). The base map was drawn using ARCGIS v.9.3 (ESRI, Redlands, CA, USA). (c) Changes of the mean posterior probability [ $\ln P(D)$ ] ( $\pm$ SD) values of each  $K$  calculated according to Pritchard *et al.* (2000) (dot plot); and the corresponding  $\Delta K$  statistics calculated according to Evanno *et al.* (2005) (line diagram) based on the nine neutral EST-SSR loci. (d) Principal coordinates analysis (PCoA) of the 577 individuals from the four species of the species complex based on EST-SSR variations (nine neutral loci).

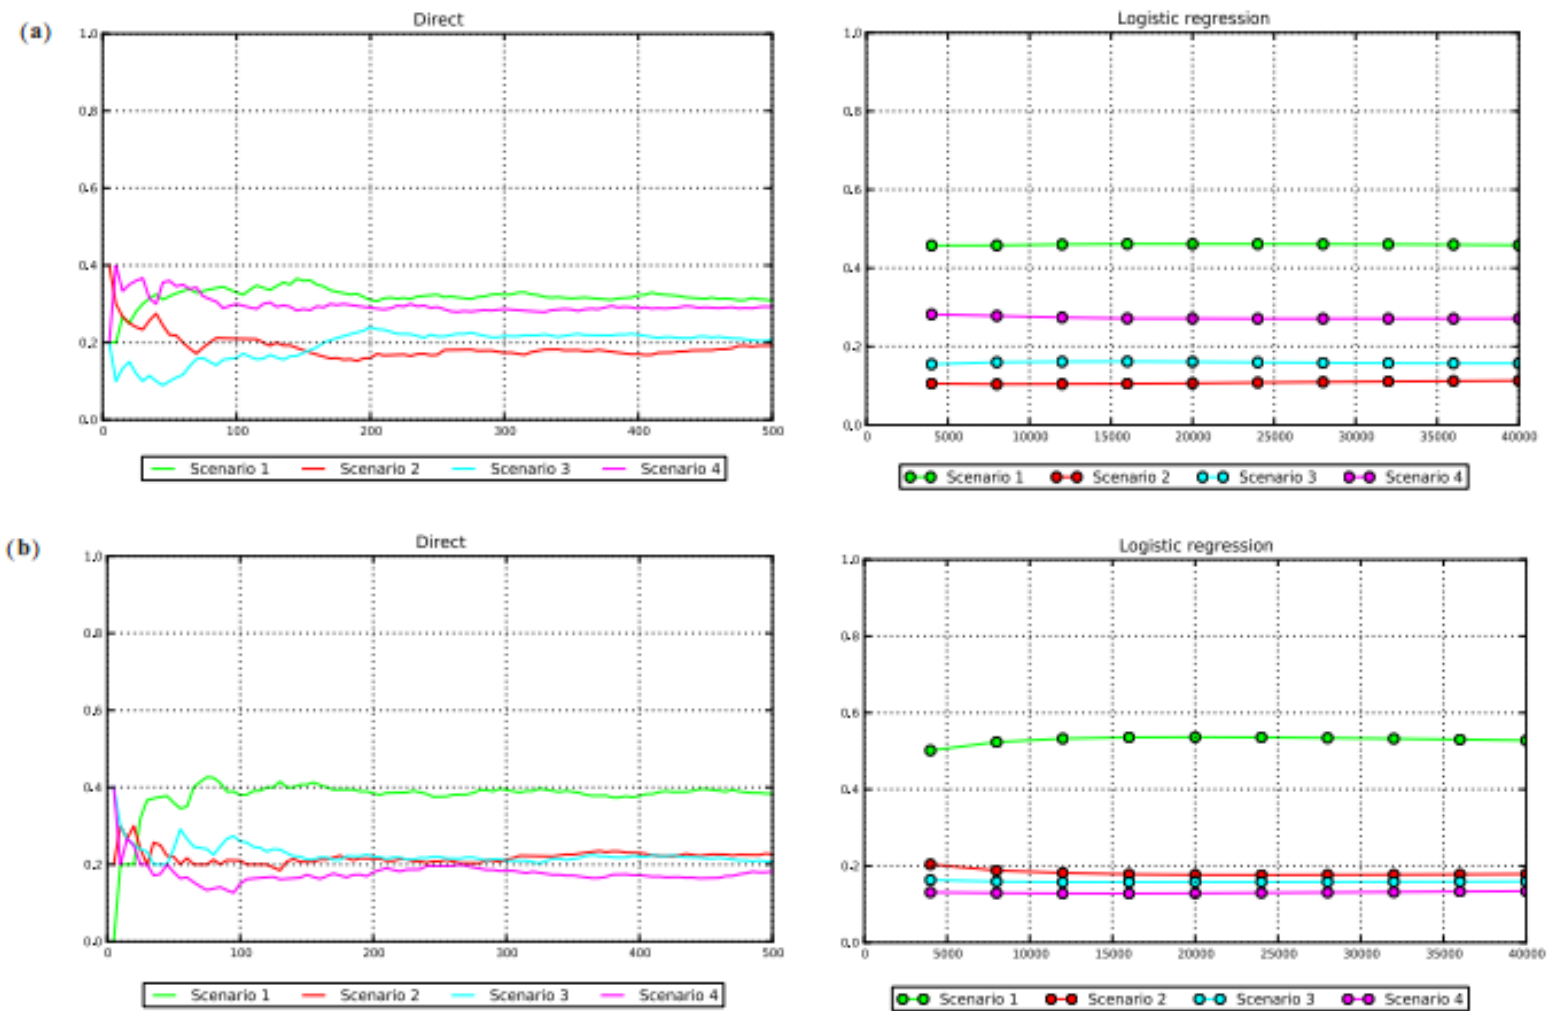

**Figure S4.** ABC model selection results using direct estimate and multinomial logistic regression approaches.

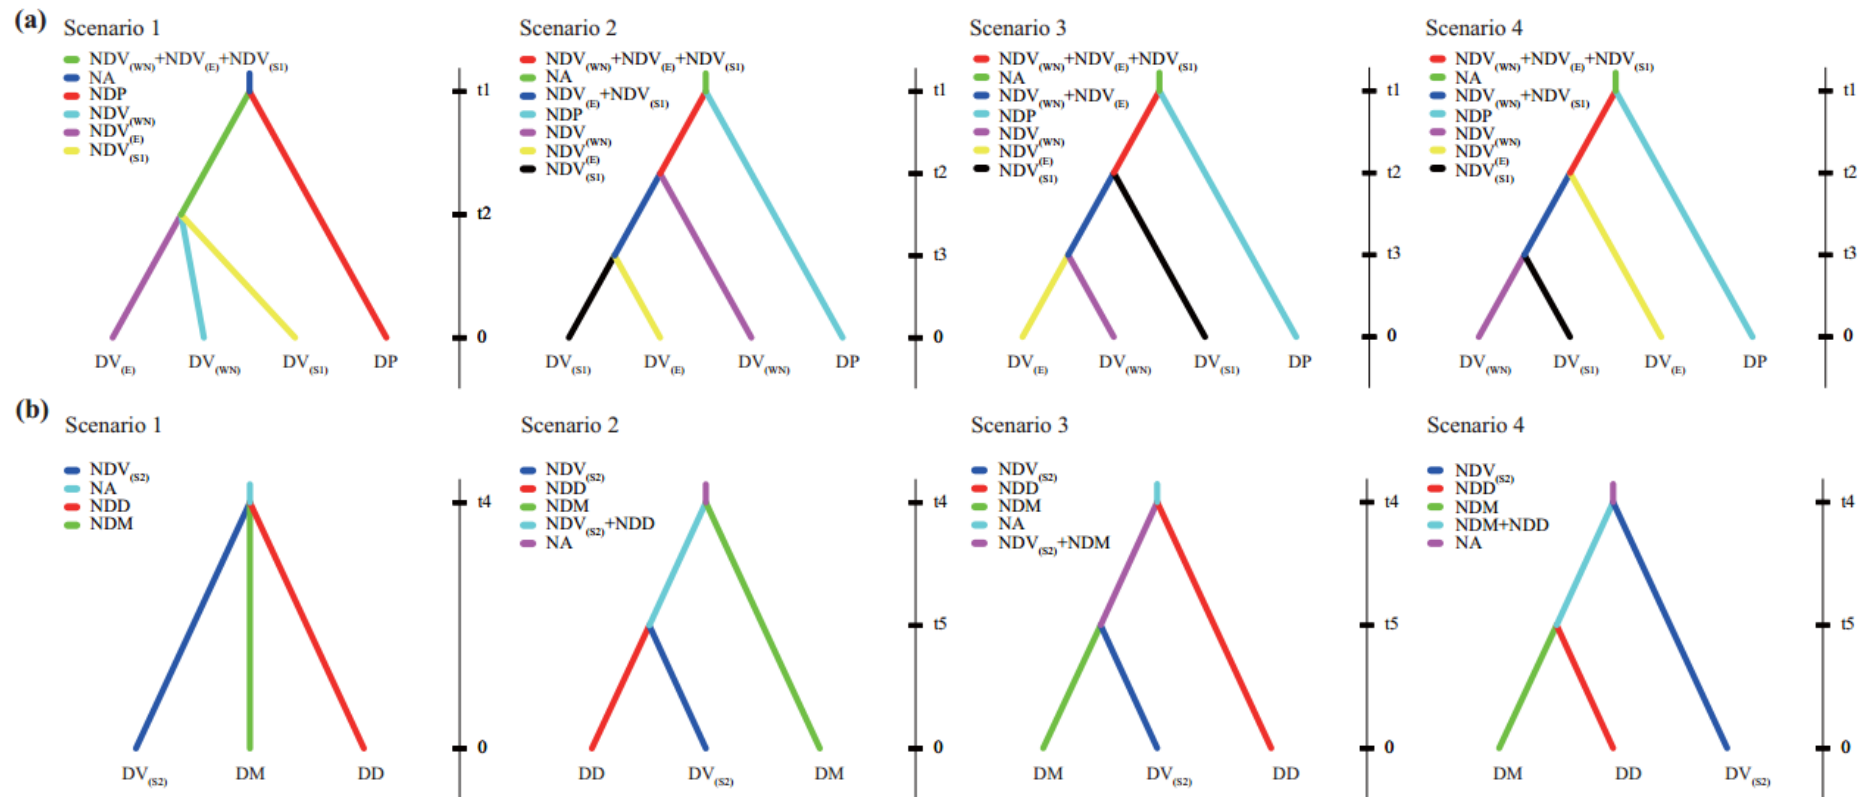

**Figure S5.** ABC modeling of scenarios for the diversification history of (a) the three regional EST-SSR (STRUCTURE) clusters of *Dysosma versipellis s. lat.* (west-north, east, south); and (b) the three taxonomic units of its ‘southern cluster’, i.e. *D. versipellis* (south), *D. difformis*

and *D. majoensis*. Divergence times ( $t_1-t_5$ ; not to scale) are indicated and effective population sizes are marked in different colours. For parameter codes and scenario descriptions, see Table 4 and Supplementary Table S5, respectively.

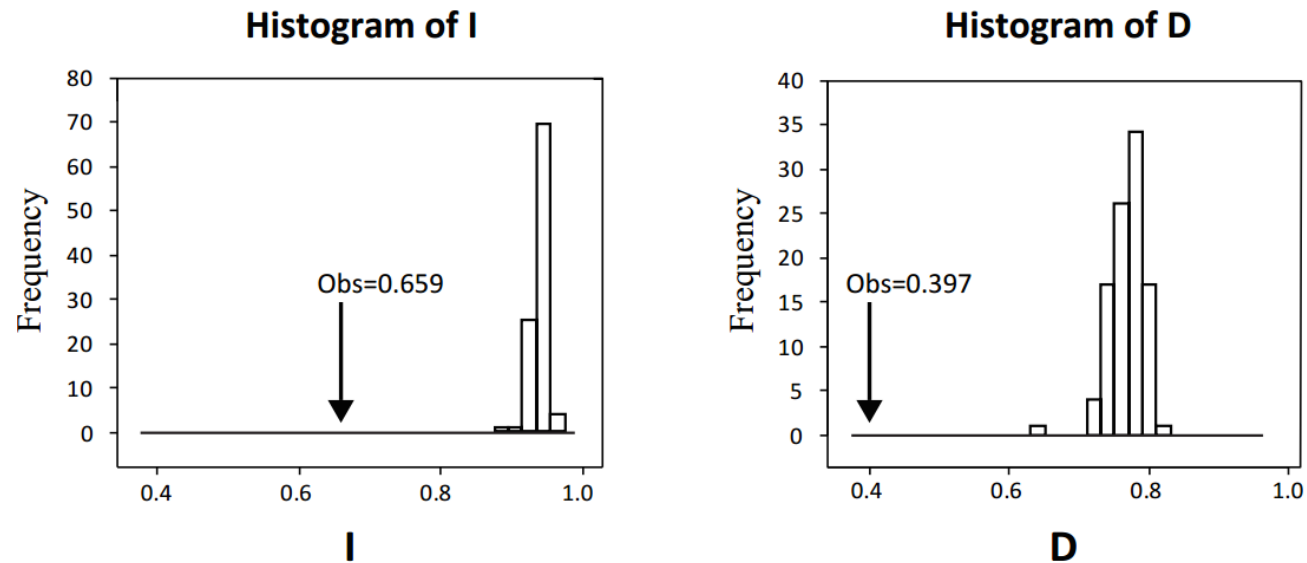

**Figure S6. The results of identity tests between *Dysosma versipellis s. lat.* and *D. pleiantha* inhabiting, respectively, warm temperate deciduous (WTD) and warm temperate evergreen (WTE) forest in subtropical China.** Bars indicate the null distributions of the standardized Hellinger distance ( $I$ ) and Schoener's  $D$ , both generated from 100 randomizations. The x-axis indicates values of  $I$  and  $D$ , and the y-axis indicates the number of randomizations. The arrows indicate values of the actual MAXENT runs.











**Table S2.** Geographic and genetic characteristics of *Dysosma* population samples used in this study.  $n$ , number of individuals;  $h$ , haplotype diversity;  $\pi$ , nucleotide diversity;  $N_A$ , number of alleles;  $A_R$ , allele richness;  $H_E$ , expected heterozygosity;  $F_{IS}$ , fixation index.

| Species/<br>Population code | Locality                        | Latitude<br>(N) | Longitude<br>(E) | Altitude<br>(m) | $n$<br>(cpDNA/EST-SSR) | cpDNA           |                                     |                     | EST-SSR<br>(All 15 loci/nine neutral loci) |             |             |               |
|-----------------------------|---------------------------------|-----------------|------------------|-----------------|------------------------|-----------------|-------------------------------------|---------------------|--------------------------------------------|-------------|-------------|---------------|
|                             |                                 |                 |                  |                 |                        | $h$ ( $\pm$ SD) | $\pi \times 10^{-3}$<br>( $\pm$ SD) | haplotypes          | $N_A$                                      | $A_R$       | $H_E$       | $F_{IS}$      |
| <i>Dysosma versipellis</i>  |                                 |                 |                  |                 |                        |                 |                                     |                     |                                            |             |             |               |
| EM                          | Mt. E'mei,<br>Sichuan Province  | 29°35'          | 103°21'          | 1200            | 12/23                  | 0.167           | 0.13                                | H6, H7              | 44/28                                      | 1.274/1.307 | 0.274/0.307 | -0.014/-0.102 |
| DJ                          | Dujiangyan,<br>Sichuan Province | 31°06'          | 103°38'          | 1290            | 11/21                  | 0.491           | 0.29                                | H2–H5               | 38/25                                      | 1.403/1.393 | 0.396/0.386 | -0.756/-0.714 |
| JF                          | Mt. Jinfo,<br>Chongqing City    | 29°10'          | 107°10'          | 1650            | 12/–                   | 0.167           | 0.60                                | H35, H36            | –                                          | –           | –           | –             |
| ML                          | Malipo, Yunnan<br>Province      | 23°07'          | 104°45'          | 1805            | 11/11                  | 0.182           | 0.07                                | H1, H46             | 24/13                                      | 1.102/1.105 | 0.101/0.103 | -0.138/-0.373 |
| NG                          | Mt. Nangong,<br>Shanxi Province | 32°15'          | 109°04'          | 1800            | 10/–                   | 0.556           | 0.34                                | H19, H20            | –                                          | –           | –           | –             |
| SN                          | Shennongjia,<br>Hubei Province  | 31°28'          | 110°22'          | 2000–2700       | 10/33                  | 0               | 0                                   | H18                 | 56/39                                      | 1.457/1.496 | 0.459/0.497 | 0.212/0.161   |
| TP                          | Mt. Tianping,<br>Hunan Province | 29°08'          | 110°28'          | 1000            | 10/14                  | 0.712           | 0.50                                | H8, H9,<br>H26, H27 | 38/24                                      | 1.403/1.422 | 0.402/0.421 | -0.077/-0.055 |
| TT                          | Tiantangzhai,<br>Anhui Province | 31°14'          | 115°74'          | 900–1200        | 18/36                  | 0.837           | 0.74                                | H28–H34             | 47/29                                      | 1.257/1.292 | 0.257/0.292 | -0.029/-0.061 |
| HS                          | Mt. Huang, Anhui<br>Province    | 30°08'          | 118°18'          | 800–1000        | 10/16                  | 0.757           | 0.93                                | H1,<br>H11–H15      | 37/24                                      | 1.275/1.316 | 0.275/0.316 | 0.028/0.012   |

|     |                                |        |         |          |       |       |      |              |       |             |             |               |
|-----|--------------------------------|--------|---------|----------|-------|-------|------|--------------|-------|-------------|-------------|---------------|
| HX  | Haixing, Jiangxi Province      | 29°55' | 116°87' | 800      | 12/11 | 0.318 | 0.20 | H9, H14, H16 | 36/24 | 1.293/1.386 | 0.296/0.391 | 0.219/0.246   |
| FL  | Fuliang, Jiangxi Province      | 29°55' | 117°66' | 800      | 10/2  | 0.511 | 0.22 | H8–H10       | 25/16 | 1.344/1.463 | 0.304/0.406 | 0.059/0.077   |
| SQ  | Mt. Sanqing, Jiangxi Province  | 28°54' | 118°03' | 800      | 18/26 | 0.386 | 0.28 | H1, H23, H24 | 44/31 | 1.350/1.468 | 0.351/0.470 | 0.174/0.190   |
| TB  | Mt. Tongba, Jiangxi Province   | 28°05' | 118°15' | 700–900  | 8/8   | 0     | 0    | H1           | 22/14 | 1.203/1.299 | 0.192/0.278 | -0.783/-1.000 |
| JG  | Mt. Jinggang, Jiangxi Province | 26°28' | 114°13' | 300–500  | 11/11 | 0     | 0    | H37          | 26/17 | 1.212/1.226 | 0.208/0.222 | -0.422/-0.354 |
| QIY | Mt. Qiyun, Jiangxi Province    | 25°46' | 113°57' | 570      | 14/13 | 0.495 | 0.43 | H38–H41      | 31/24 | 1.276/1.403 | 0.274/0.401 | -0.200/-0.130 |
| NK  | Mt. Nankun, Guangdong Province | 32°15' | 109°04' | 1800     | 17/19 | 0     | 0    | H42          | 28/18 | 1.195/1.165 | 0.195/0.165 | -0.093/-0.015 |
| YB  | Mt. Yuanbao, Guangxi Province  | 25°26' | 109°09' | 1400     | 14/17 | 0     | 0    | H1           | 38/22 | 1.374/1.382 | 0.373/0.384 | -0.063/0.166  |
| JN  | Jianning, Fujian Province      | 26°55' | 116°41' | 500–700  | 19/29 | 0.368 | 0.15 | H43–H45      | 37/24 | 1.215/1.208 | 0.216/0.209 | 0.048/0.223   |
| MHP | Mt. Huping, Hunan Province     | 30°01' | 110°32' | 900–1200 | 7/11  | 0     | 0    | H1           | 32/20 | 1.221/1.199 | 0.225/0.203 | 0.381/0.401   |
| LS  | Mt. Lu, Jiangxi Province       | 29°32' | 115°59' | 1082     | 10/11 | 0.644 | 0.37 | H1, H12, H17 | 38/25 | 1.295/1.319 | 0.299/0.322 | 0.249/0.216   |
| TN  | Taining, Fujian Province       | 26°54' | 117°10' | 700      | 15/16 | 0     | 0    | H43          | 30/19 | 1.157/1.162 | 0.157/0.162 | -0.091/0.013  |
| MT  | Mt. Matou,                     | 27°48' | 117°08' |          | -/3   | –     | –    | –            | 28/19 | 1.291/1.374 | 0.300/0.389 | 0.074/0.095   |

|                          |                                      |        |         |         |       |                               |                               |         |        |              |             |               |
|--------------------------|--------------------------------------|--------|---------|---------|-------|-------------------------------|-------------------------------|---------|--------|--------------|-------------|---------------|
|                          | Jiangxi province                     |        |         |         |       |                               |                               |         |        |              |             |               |
| ZP                       | Zhenping county,<br>Shanxi province  | 31°59' | 109°20' |         | -/17  | -                             | -                             | -       | 19/12  | 1.080/1.076  | 0.078/0.075 | -0.856/-0.749 |
| BJ                       | Bijie, Guizhou<br>Province           | 27°24' | 105°54' | 1697    | 3/2   | 0                             | 0                             | H56     | 18/11  | 1.133/1.148  | 0.100/0.111 | -1.000/-1.000 |
| Species mean             |                                      |        |         |         |       | <b>0.300</b><br><b>(0.29)</b> | <b>0.239</b><br><b>(0.27)</b> |         | 33/21  | 1.264/1.300  | 0.261/0.296 | -0.140/-0.125 |
| Species total            |                                      |        |         |         |       | <b>0.902</b>                  | <b>1.42</b>                   |         | 127/80 | 6. 403/6.795 | 0.619/0.635 | 0.529/0.503   |
| <i>Dysosma pleiantha</i> |                                      |        |         |         |       |                               |                               |         |        |              |             |               |
| TM                       | Mt. Tianmu,<br>Zhejiang<br>Province  | 30°19' | 119°26' | 400     | 19/26 | 0.450                         | 0.22                          | H48–H51 | 58/42  | 1.412/1.464  | 0.414/0.465 | 0.188/0.141   |
| DQ                       | Deqing, Zhejiang<br>Province         | 28°54' | 118°03' | 400–500 | 9/36  | 0                             | 0                             | H48     | 43/26  | 1.319/1.337  | 0.320/0.337 | 0.172/0.086   |
| TH                       | Mt. Tiantai,<br>Zhejiang<br>Province | 29°14' | 120°00' | 500     | 5/17  | 0                             | 0                             | H47     | 42/31  | 1.372/1.489  | 0.374/0.492 | 0.152/0.158   |
| XJ                       | Xianju, Zhejiang<br>Province         | 28°42' | 120°36' | 500     | 8/8   | 0                             | 0                             | H48     | 18/12  | 1.101/1.168  | 0.094/0.157 | -0.765/-0.765 |
| WY                       | Wuyanling,<br>Zhejiang<br>Province   | 27°41' | 119°40' | 1065    | 10/14 | 0                             | 0                             | H48     | 39/26  | 1.323/1.387  | 0.323/0.385 | 0.030/-0.147  |

|                          |                                  |        |         |           |       |               |               |         |       |             |             |               |
|--------------------------|----------------------------------|--------|---------|-----------|-------|---------------|---------------|---------|-------|-------------|-------------|---------------|
| DY                       | Mt. Daiyun,<br>Fujian Province   | 25°38' | 118°11' | 300       | 21/24 | 0             | 0             | H48     | 45/33 | 1.320/1.481 | 0.320/0.481 | 0.045/0.027   |
| QY                       | Mt. Qingyun,<br>Fujian Province  | 26°01' | 118°55' | 600       | 19/23 | 0             | 0             | H48     | 30/20 | 1.292/1.410 | 0.287/0.403 | -0.770/-0.811 |
| TY                       | County Taoyuan,<br>Taiwan        | 24°43' | 121°26' | 1995      | 6/5   | 0             | 0             | H48     | 26/15 | 1.289/1.267 | 0.287/0.267 | -0.070/0.000  |
| YL                       | County Yilan,<br>Taiwan          | 24°34' | 121°24' | 1594/1699 | 18/13 | 0             | 0             | H48     | 33/22 | 1.343/1.435 | 0.343/0.434 | 0.005/-0.064  |
| DH                       | Mt. Dahun,<br>Taiwan, China      | 24°41' | 121°17' | 1520      | 9/8   | 0             | 0             | H48     | 37/26 | 1.362/1.468 | 0.358/0.460 | -0.165/-0.237 |
| QL                       | Mt. qingliang,<br>Anhui province | 30°06' | 118°54' | 600       | -/4   | –             | –             | –       | 25/17 | 1.258/1.333 | 0.298/0.434 | 0.032/0.123   |
| Species mean             |                                  |        |         |           |       | <b>0.045</b>  | <b>0.02</b>   |         | 36/25 | 1.308/1.385 | 0.311/0.392 | -0.104/-0.135 |
|                          |                                  |        |         |           |       | <b>(0.14)</b> | <b>(0.07)</b> |         |       |             |             |               |
| Species total            |                                  |        |         |           |       | <b>0.154</b>  | <b>0.07</b>   |         | 85/60 | 3.347/4.116 | 0.473/0.541 | 0.296/0.180   |
| <i>Dysosma difformis</i> |                                  |        |         |           |       |               |               |         |       |             |             |               |
| HP                       | Huaping,<br>Guangxi Province     | 25°38' | 109°54' | 700       | 8/8   | 0             | 0             | H1      | 45/29 | 1.481/1.494 | 0.500/0.507 | 0.491/0.381   |
| HPS                      | Mt. Huping,<br>Hunan Province    | 30°01' | 110°32' | 925       | 4/3   | 0.500         | 0.20          | H1, H55 | 22/14 | 1.200/1.229 | 0.200/0.241 | 0.000/0.231   |

|                          |                                  |        |         |      |       |                               |                              |                |               |                    |             |               |
|--------------------------|----------------------------------|--------|---------|------|-------|-------------------------------|------------------------------|----------------|---------------|--------------------|-------------|---------------|
| BD                       | Mt. Tianping,<br>Hunan Province  | 29°45' | 110°03' | 1513 | 8/8   | 0                             | 0                            | H55            | 33/20         | 1.419/1.455        | 0.412/0.444 | -0.254/-0.375 |
| SH                       | Mt. Shunhuang,<br>Hunan Province | 26°26' | 110°58' | 993  | 15/16 | 0.657                         | 0.36                         | H1,<br>H52–H54 | 52/31         | 1.431/1.435        | 0.432/0.439 | 0.070/0.280   |
| Species mean             |                                  |        |         |      |       | <b>0.289</b><br><b>(0.34)</b> | <b>0.14</b><br><b>(0.17)</b> |                | 38/24         | 1.383/1.403        | 0.386/0.408 | 0.077/0.129   |
| Species total            |                                  |        |         |      |       | <b>0.696</b>                  | <b>0.40</b>                  |                | 74/45         | 4.879/4.974        | 0.610/0.627 | 0.377/0.410   |
| <i>Dysosma majoensis</i> |                                  |        |         |      |       |                               |                              |                |               |                    |             |               |
| FJ                       | Mt. Fanjing,<br>Guizhou Province | 27°56' | 108°36' | 942  | 6/6   | 0                             | 0                            | H55            | 30/21         | 1.322/1.379        | 0.336/0.393 | 0.404/0.387   |
| GJF                      | Mt. Jinfo,<br>Chongqing          | 29°00' | 107°11' | 1823 | 5/5   | 0                             | 0                            | H55            | 28/16         | 1.202/1.146        | 0.203/0.147 | 0.082/0.094   |
| GEM                      | Mt. E'mei,<br>Sichuan Province   | 29°35' | 103°22' | 2200 | 3/3   | 0                             | 0                            | H55            | 24/16         | 1.289/1.311        | 0.244/0.305 | 0.122/-0.091  |
| Species mean             |                                  |        |         |      |       | 0                             | 0                            |                | 27/18         | 1.271/1.278        | 0.261/0.282 | 0.203/0.130   |
| Species total            |                                  |        |         |      |       | 0                             | 0                            |                | 48/33         | 3.014/3.548        | 0.447/0.464 | 0.523/0.512   |
| <b>All total</b>         |                                  |        |         |      |       | <b>0.929</b>                  | <b>3.58</b>                  |                | <b>138/85</b> | <b>5.064/5.589</b> |             |               |

**Table S3.** BEAST-derived estimates of  $T_{MRC A}$  and their 95% highest posterior densities (HPDs) under two coalescent models (constant population-size and population expansion models) for relevant nodes of the Bayesian inference (BI) phylogeny of *Dysosma* (plus outgroups) based on cpDNA sequence data (see Fig. 2).

| Node code | Descriptions of the corresponding clade                              | Model                   |                            |
|-----------|----------------------------------------------------------------------|-------------------------|----------------------------|
|           |                                                                      | Constant size (HPD 95%) | Expansion growth (HPD 95%) |
| Node A    | <i>Dysosma</i> clade                                                 | 4.14 (2.74–5.44) Ma     | 3.44 (2.30–4.68) Ma        |
| Node B    | <i>D. delavayi</i> and <i>D. versipellis-pleiantha</i> complex clade | 3.33 (2.15–4.26) Ma     | 2.66 (1.74–3.63) Ma        |
| Node C    | <i>D. versipellis-pleiantha</i> complex                              | 2.16 (1.33–2.72) Ma     | 1.66 (1.42–3.07) Ma        |
| Node D    | Western and eastern lineages                                         | 1.61 (0.81–2.09) Ma     | 1.23 (0.74–1.73) Ma        |
| Node E    | Central-eastern lineage                                              | 1.36 (0.81–1.68) Ma     | 1.02 (0.70–1.36) Ma        |
| Node F    | Western lineage                                                      | 0.91 (0.33–1.27) Ma     | 0.70 (0.39–1.07) Ma        |
| Node G    | Eastern lineage                                                      | 0.59 (0.11–0.88) Ma     | 0.52 (0.25–0.83) Ma        |

**Table S4.** Selective outliers identified by different  $F_{ST}$ -based neutrality test methods as implemented in LOSITAN, BAYESCAN and ARLEQUIN. Selective outliers are denoted by a plus sign (+) when the  $P$ -value was  $< 0.05$ . Following a Bonferroni correction, selective outliers exhibiting significance are indicated by an asterisk (\*).

| Outlier detection method | Locus            |        |         |                   |        |        |
|--------------------------|------------------|--------|---------|-------------------|--------|--------|
|                          | Positive outlier |        |         | Balancing outlier |        |        |
|                          | EDV-46           | EDV-52 | EDV-119 | EDV-60            | EDV-67 | EDV-82 |
| LOSITAN                  | +                | *      | +       | *                 | *      | *      |
| BAYESCAN                 | *                | *      |         | +                 |        |        |
| ARLEQUIN                 | *                | *      | +       | *                 | *      | +      |

**Table S5. Four scenarios each tested by DIYABC modeling for the diversification history of (a) the three regional EST-SSR (STRUCTURE) clusters of *D. versipellis s. lat.* (west-north, east, south); and (b) the three taxonomic units of its ‘southern cluster’, i.e. *D. versipellis* (south), *D. difformis*, and *D. majoensis*. See also Supplementary Fig. S5 for scenario illustrations. Note that *D. pleiantha* was generally assumed as sister, based on the cpDNA haplotype network analysis (see Results, Fig. 1c). In (a), DP, DV<sub>(WN)</sub>, DV<sub>(E)</sub>, and DV<sub>(S1)</sub> represent, respectively, *D. pleiantha*, *D. versipellis* west-north cluster, *D. versipellis* east cluster and *D. versipellis* south cluster (including *D. difformis* and *D. majoensis*). In (b), DV<sub>(S2)</sub>, DD, and DM represent, respectively, *D. versipellis* south cluster, *D. difformis* and *D. majoensis*.**

| Scenario   | Description of divergence scenarios                                                                                                                                                                                                                                                                                               |
|------------|-----------------------------------------------------------------------------------------------------------------------------------------------------------------------------------------------------------------------------------------------------------------------------------------------------------------------------------|
| (a)        |                                                                                                                                                                                                                                                                                                                                   |
| Scenario 1 | DP and a common ancestor of DV <sub>(E)</sub> , DV <sub>(S1)</sub> and DV <sub>(WN)</sub> diverged at t <sub>1</sub> , and then DV <sub>(E)</sub> , DV <sub>(S1)</sub> and DV <sub>(WN)</sub> diverged at t <sub>2</sub> simultaneously.                                                                                          |
| Scenario 2 | DP and a common ancestor of DV <sub>(E)</sub> , DV <sub>(S1)</sub> and DV <sub>(WN)</sub> diverged at t <sub>1</sub> , and then DV <sub>(WN)</sub> and a common ancestor of DV <sub>(S1)</sub> and DV <sub>(E)</sub> diverged at t <sub>2</sub> , finally, DM and DD diverged at t <sub>3</sub> .                                 |
| Scenario 3 | DP and a common ancestor of DV <sub>(E)</sub> , DV <sub>(S1)</sub> and DV <sub>(WN)</sub> diverged at t <sub>1</sub> , and then DV <sub>(S1)</sub> and a common ancestor of DV <sub>(E)</sub> and DV <sub>(WN)</sub> diverged at t <sub>2</sub> , finally, DV <sub>(E)</sub> and DV <sub>(WN)</sub> diverged at t <sub>3</sub> .  |
| Scenario 4 | DP and a common ancestor of DV <sub>(E)</sub> , DV <sub>(S1)</sub> and DV <sub>(WN)</sub> diverged at t <sub>1</sub> , and then DV <sub>(E)</sub> and a common ancestor of DV <sub>(S1)</sub> and DV <sub>(WN)</sub> diverged at t <sub>2</sub> , finally, DV <sub>(S1)</sub> and DV <sub>(WN)</sub> diverged at t <sub>3</sub> . |
| (b)        |                                                                                                                                                                                                                                                                                                                                   |
| Scenario 1 | DV <sub>(S2)</sub> , DM and DD diverged at t <sub>4</sub> simultaneously.                                                                                                                                                                                                                                                         |
| Scenario 2 | DM and a common ancestor of DD and DV <sub>(S2)</sub> diverged at t <sub>4</sub> , then DD and DV <sub>(S2)</sub> diverged at t <sub>5</sub> .                                                                                                                                                                                    |
| Scenario 3 | DD and a common ancestor of DM and DV <sub>(S2)</sub> diverged at t <sub>4</sub> , then DM and DV <sub>(S2)</sub> diverged at t <sub>5</sub> .                                                                                                                                                                                    |
| Scenario 4 | DV <sub>(S2)</sub> and a common ancestor of DD and DM diverged at t <sub>4</sub> , then DD and DM diverged at t <sub>5</sub> .                                                                                                                                                                                                    |



**Table S6.** Primer information of the five newly-developed EST-SSR markers used in this study.

| Locus   | Forward primer sequences (5'–3') | Reverse primer sequences (5'–3') | Repeated motif     | Size range (bp) |
|---------|----------------------------------|----------------------------------|--------------------|-----------------|
| EDV-81  | CTCTGACGAATCATCCTCCTCTA          | ACATTATGCTAGTGATGGCGTTT          | (TTC) <sub>5</sub> | 154–172         |
| EDV-82  | TACTGAGGGAGTTCCATGAGATG          | CAACTCAAACCTTCTTCTGGGTA          | (GGT) <sub>5</sub> | 159–186         |
| EDV-102 | AGACGCTATAGAGTTTTACCGCC          | ATCTTGAATTGAACCAGTCCGTA          | (TGG) <sub>5</sub> | 146–167         |
| EDV-118 | AGAGAGCTGATGCTAAGGTGTTG          | ATCTTACTCTGCTGCCTCTGATG          | (CTT) <sub>5</sub> | 71–86           |
| EDV-119 | ACACCTTACGATCGACCTCCTAC          | TCAACAAGTCTCAAAACCCAAC           | (GCA) <sub>5</sub> | 95–125          |

**Table S7.** GenBank accession numbers of all newly generated cpDNA haplotypes (including outgroups) identified within the *Dysosma versipellis-pleiantha* complex.

| Species                            | Haplotype | GenBank accession number |                  |                   |
|------------------------------------|-----------|--------------------------|------------------|-------------------|
|                                    |           | <i>trnL-trnF</i>         | <i>trnF-ndhJ</i> | <i>trnS-trnfM</i> |
| <i>D. versipellis/D. difformis</i> | H1        | KT290738                 | KT290670         | KT290806          |
| <i>D. versipellis</i>              | H2        | KT290739                 | KT290671         | KT290807          |
| <i>D. versipellis</i>              | H3        | KT290740                 | KT290672         | KT290808          |
| <i>D. versipellis</i>              | H4        | KT290741                 | KT290673         | KT290809          |
| <i>D. versipellis</i>              | H5        | KT290742                 | KT290674         | KT290810          |
| <i>D. versipellis</i>              | H6        | KT290743                 | KT290675         | KT290811          |
| <i>D. versipellis</i>              | H7        | KT290744                 | KT290676         | KT290812          |
| <i>D. versipellis</i>              | H8        | KT290745                 | KT290677         | KT290813          |
| <i>D. versipellis</i>              | H9        | KT290746                 | KT290678         | KT290814          |
| <i>D. versipellis</i>              | H10       | KT290747                 | KT290679         | KT290815          |
| <i>D. versipellis</i>              | H11       | KT290748                 | KT290680         | KT290816          |
| <i>D. versipellis</i>              | H12       | KT290749                 | KT290681         | KT290817          |
| <i>D. versipellis</i>              | H13       | KT290750                 | KT290682         | KT290818          |
| <i>D. versipellis</i>              | H14       | KT290751                 | KT290683         | KT290819          |
| <i>D. versipellis</i>              | H15       | KT290752                 | KT290684         | KT290820          |
| <i>D. versipellis</i>              | H16       | KT290753                 | KT290685         | KT290821          |
| <i>D. versipellis</i>              | H17       | KT290754                 | KT290686         | KT290822          |
| <i>D. versipellis</i>              | H18       | KT290755                 | KT290687         | KT290823          |
| <i>D. versipellis</i>              | H19       | KT290756                 | KT290688         | KT290824          |
| <i>D. versipellis</i>              | H20       | KT290757                 | KT290689         | KT290825          |
| <i>D. versipellis</i>              | H21       | KT290758                 | KT290690         | KT290826          |
| <i>D. versipellis</i>              | H22       | KT290759                 | KT290691         | KT290827          |
| <i>D. versipellis</i>              | H23       | KT290760                 | KT290692         | KT290828          |
| <i>D. versipellis</i>              | H24       | KT290761                 | KT290693         | KT290829          |
| <i>D. versipellis</i>              | H25       | KT290762                 | KT290694         | KT290830          |
| <i>D. versipellis</i>              | H26       | KT290763                 | KT290695         | KT290831          |
| <i>D. versipellis</i>              | H27       | KT290764                 | KT290696         | KT290832          |

---

|                                  |     |          |          |          |
|----------------------------------|-----|----------|----------|----------|
| <i>D. versipellis</i>            | H28 | KT290765 | KT290697 | KT290833 |
| <i>D. versipellis</i>            | H29 | KT290766 | KT290698 | KT290834 |
| <i>D. versipellis</i>            | H30 | KT290767 | KT290699 | KT290835 |
| <i>D. versipellis</i>            | H31 | KT290768 | KT290700 | KT290836 |
| <i>D. versipellis</i>            | H32 | KT290769 | KT290701 | KT290837 |
| <i>D. versipellis</i>            | H33 | KT290770 | KT290702 | KT290838 |
| <i>D. versipellis</i>            | H34 | KT290771 | KT290703 | KT290839 |
| <i>D. versipellis</i>            | H35 | KT290772 | KT290704 | KT290840 |
| <i>D. versipellis</i>            | H36 | KT290773 | KT290705 | KT290841 |
| <i>D. versipellis</i>            | H37 | KT290774 | KT290706 | KT290842 |
| <i>D. versipellis</i>            | H38 | KT290775 | KT290707 | KT290843 |
| <i>D. versipellis</i>            | H39 | KT290776 | KT290708 | KT290844 |
| <i>D. versipellis</i>            | H40 | KT290777 | KT290709 | KT290845 |
| <i>D. versipellis</i>            | H41 | KT290778 | KT290710 | KT290846 |
| <i>D. versipellis</i>            | H42 | KT290779 | KT290711 | KT290847 |
| <i>D. versipellis</i>            | H43 | KT290780 | KT290712 | KT290848 |
| <i>D. versipellis</i>            | H44 | KT290781 | KT290713 | KT290849 |
| <i>D. versipellis</i>            | H45 | KT290782 | KT290714 | KT290850 |
| <i>D. versipellis</i>            | H46 | KT290783 | KT290715 | KT290851 |
| <i>D. pleiantha</i>              | H47 | KT290784 | KT290716 | KT290852 |
| <i>D. pleiantha</i>              | H48 | KT290785 | KT290717 | KT290853 |
| <i>D. pleiantha</i>              | H49 | KT290786 | KT290718 | KT290854 |
| <i>D. pleiantha</i>              | H50 | KT290787 | KT290719 | KT290855 |
| <i>D. pleiantha</i>              | H51 | KT290788 | KT290720 | KT290856 |
| <i>D. difformis</i>              | H52 | KT290789 | KT290721 | KT290857 |
| <i>D. difformis</i>              | H53 | KT290790 | KT290722 | KT290858 |
| <i>D. difformis</i>              | H54 | KT290791 | KT290723 | KT290859 |
| <i>D. difformis/D. majoensis</i> | H55 | KT290792 | KT290724 | KT290860 |
| <i>D. versipellis</i>            | H56 | KT290793 | KT290725 | KT290861 |
| <i>D. delavayi</i> voucher 60    |     | KT290794 | KT290726 | KT290862 |
| <i>D. delavayi</i> voucher 61    |     | KT290795 | KT290727 | KT290863 |
| <i>D. delavayi</i> voucher 62    |     | KT290796 | KT290728 | KT290864 |

---

|                                      |          |          |          |
|--------------------------------------|----------|----------|----------|
| <i>D. delavayi</i> voucher 63        | KT290797 | KT290729 | KT290865 |
| <i>D. delavayi</i> voucher 64        | KT290798 | KT290730 | KT290866 |
| <i>D. delavayi</i> voucher 65        | KT290799 | KT290731 | KT290867 |
| <i>D. delavayi</i> voucher 66        | KT290800 | KT290732 | KT290868 |
| <i>D. aurantiocaulis</i> voucher YN1 | KT290801 | KT290733 | KT290869 |
| <i>D. aurantiocaulis</i> voucher YN2 | KT290802 | KT290734 | KT290870 |
| <i>D. tsayuensis</i>                 | KT290803 | KT290735 | KT290871 |
| <i>Sinopodophyllum hexandrum</i>     | KT290736 | KT290668 | KT290804 |
| <i>Podophyllum peltatum</i>          | KT290737 | KT290669 | KT290805 |

---

## References

- Beaumont, M.A., Zhang, W. & Balding, D.J. Approximate Bayesian computation in population genetics. *Genetics* **162**, 2025-2035 (2002).
- Chapuis, M. & Estoup, A. Microsatellite null alleles and estimation of population differentiation. *Mol. Biol. Evol.* **24**, 621-631 (2007).
- Cornuet, J. et al. Inferring population history with DIY ABC: a user-friendly approach to approximate Bayesian computation. *Bioinformatics* **24**, 2713-2719 (2008).
- Cornuet, J., Ravigné, V. & Estoup, A. Inference on population history and model checking using DNA sequence and microsatellite data with the software DIYABC (v1. 0). *BMC Bioinform.* **11**, 1 (2010).
- Dempster, A.P., Laird, N.M. & Rubin, D.B. Maximum likelihood from incomplete data via the EM algorithm. *J. R. Stat. Soc. Series. B. Stat. Methodol.* **39**, 1-38 (1977).
- Drummond, A.J. & Rambaut, A. BEAST: Bayesian evolutionary analysis by sampling trees. *BMC Evol. Biol.* **7**, 214 (2007).
- Ellis, J.R. & Burke, J.M. EST-SSRs as a resource for population genetic analyses. *Heredity* **99**, 125-132 (2007).
- Estoup, A., Jarne, P. & Cornuet, J.M. Homoplasy and mutation model at microsatellite loci and their consequences for population genetics analysis. *Mol. Ecol.* **11**, 1591-1604 (2002).
- Evanno, G., Regnaut, S. & Goudet, J. Detecting the number of clusters of individuals using the software STRUCTURE: a simulation study. *Mol. Ecol.* **14**, 2611-2620 (2005).
- Goudet, J. FSTAT, version 2.9.3.2. A program to estimate and test gene diversities and fixation indices. <http://www2.unil.ch/popgen/siftwares/fstat.htm> (2001).
- Miller, M.A., Pfeiffer, W. & Schwartz, T. Creating the CIPRES Science Gateway for inference of large phylogenetic trees. Gateway Computing Environments Workshop (GCE), New Orleans, LA, USA (2010).
- Posada, D. jModelTest: phylogenetic model averaging. *Mol. Biol. Evol.* **25**, 1253-1256 (2008).
- Pritchard, J.K., Stephens, M. & Donnelly, P. Inference of population structure using multilocus genotype data. *Genetics* **155**, 945-959 (2000).

- 
- Qiu, Y., Zhou, X., Fu, C. & Chan, Y.G. A preliminary study of genetic variation in the endangered, Chinese endemic species *Dysosma versipellis* (Berberidaceae). *Bot. Bull. Acad. Sinica.* **46**, 61–69 (2005).
- Rice, W.R. Analyzing tables of statistical tests. *Evolution* **43**, 223-225 (1989).
- Rogers, A.R. & Harpending, H. Population growth makes waves in the distribution of pairwise genetic differences. *Mol. Biol. Evol.* **9**, 552-569 (1992).
- Rogers, A.R. Genetic evidence for a Pleistocene population explosion. *Evolution* **49**, 608-615 (1995).
- Ronquist, F. & Huelsenbeck, J.P. MrBayes 3: Bayesian phylogenetic inference under mixed models. *Bioinformatics* **19**, 1572-1574 (2003).
- Rousset, F. Genepop'007: a complete re-implementation of the genepop software for Windows and Linux. *Mol. Ecol. Res.* **8**, 103-106 (2008).
- Schneider, S. & Excoffier, L. Estimation of past demographic parameters from the distribution of pairwise differences when the mutation rates vary among sites: application to human mitochondrial DNA. *Genetics* **152**, 1079-1089 (1999).
- Stamatakis, A., Hoover, P. & Rougemont, J. A rapid bootstrap algorithm for the RAxML web servers. *Syst. Biol.* **57**, 758-771 (2008).
- Won, Y. & Hey, J. Divergence population genetics of chimpanzees. *Mol. Biol. Evol.* **22**, 297-307 (2005).
